# Supplementary material for: The Diversity and Community Pattern of Liverworts in Sygera Mountain
Source: Preprints.org preprint supplement (doi:10.20944/preprints202310.1890.v1), 2023-10-30
Supplement: Supplementary file 1 [file supplementary]

Plot	Elevations (m)	Temperature (¡æ)	Mean Diurnal Range (¡æ)	Isothermality	Precipitation (mm)	Aridity	Richness
1	3326	5.920833111	10.9416666	39.78787994	667	5858	2
2	3576	5.383333206	11.13333321	40.19253922	668	5984	3
3	3725	3.200000048	11.03333282	39.40476227	644	6162	1
4	4130	1.975000024	10.9333334	38.77068329	638	6354	1
5	3543	3.712499857	10.77499962	39.61397171	628	5844	10
6	3168	6.824999809	10.4333334	38.78562546	684	5919	5
7	3345	6.091666698	11.05000019	40.03623199	669	5861	3
8	3573	5.254166603	11.125	40.1624527	667	6009	1
9	3725	3.200000048	11.03333282	39.40476227	644	6162	2
10	4130	1.975000024	10.9333334	38.77068329	638	6354	5
11	4385	1.137499928	11.125	39.03508759	629	6408	3
12	3270	6.362500191	11.10833359	40.99015808	652	5616	2
13	3543	3.712499857	10.77499962	39.61397171	628	5844	12
14	3961	2.737499952	10.79166698	39.38564301	624	5972	3
15	4129	0.716666639	10.83333397	38.82915115	629	6536	25
16	4385	0.450000018	11.30000019	39.23611069	628	6590	3
17	4560	-0.279166698	11.20833302	39.05342484	624	6658	2
18	3149	5.945833206	11.25833321	40.64380264	666	5806	11
19	3360	5.920833111	10.9416666	39.78787994	667	5858	5
20	3573	5.254166603	11.125	40.1624527	667	6009	5
21	3879	3.266666651	10.94999981	39.1071434	646	6210	2
22	4128	1.975000024	10.9333334	38.77068329	638	6354	10
23	4385	1.137499928	11.125	39.03508759	629	6408	1
24	3543	3.712499857	10.77499962	39.61397171	628	5844	13
25	3740	4.995833397	10.97500038	40.34926605	636	5684	8
26	3961	2.737499952	10.79166698	39.38564301	624	5972	2
27	4129	0.716666639	10.83333397	38.82915115	629	6536	18
28	3128	6.420833588	10.40833378	38.69268799	672	5834	10
29	3326	6.154166698	11.09166622	40.33333206	668	5814	7
30	3562	5.254166603	11.125	40.1624527	667	6009	11
31	3725	3.200000048	11.03333282	39.40476227	644	6162	17
32	3879	2.020833254	10.9416666	38.93831635	637	6331	10
33	4130	1.975000024	10.9333334	38.77068329	638	6354	9
34	4385	1.137499928	11.125	39.03508759	629	6408	3
35	3543	3.712499857	10.77499962	39.61397171	628	5844	11
36	3740	4.995833397	10.97500038	40.34926605	636	5684	9
37	3961	2.737499952	10.79166698	39.38564301	624	5972	5
38	4129	0.716666639	10.83333397	38.82915115	629	6536	15
